# Supplementary material
Source: publisher site journal article supplement (https://www.dovepress.com/get_supplementary_file.php?f=311966.docx)
Supplement: Supplementary file 1 [file get_supplementary_file.php]

Table S1. Descriptions of the second-level ICF codes (or descriptor codes) from the individual and negotiated goals.

| ICF code | ICF-code title | Individual | | Negotiated | |
| --- | --- | --- | --- | --- | --- |
| # | % | # | % |
| b122 | Global psychosocial functions | 1 | <1% | - | - |
| b130 | Energy and drive functions | 31 | 8% | 37 | 8% |
| b134 | Sleep functions | 1 | <1% | - | - |
| b152 | Emotional functions | 10 | 2% | 5 | 1% |
| b164  b235  b265  b280 | Higher level cognitive functions  Vestibular functions  Touch function  Sensation of pain | 2  1  1  14 | <1%  <1%  <1%  3% | -  -  -  19 | -  -  -  4% |
| b455 | Exercise tolerance functions | 34 | 8% | 40 | 8% |
| b530 | Weight maintenance functions | 4 | <1% | 7 | 1% |
| b710 | Movement of joint functions | 14 | 3% | 20 | 4% |
| b715 | Stability of joint functions | - | - | 1 | <1% |
| b730  b735  b740 | Muscle power functions  Muscle tone functions  Muscle endurance functions | 44  1  2 | 11%  <1%  <1% | 58  1  - | 12%  <1%  - |
| b755 | Involuntary movement reaction functions | 21 | 5% | 34 | 7% |
| b760 | Control of voluntary movement functions | 2 | <1% | 5 | 1% |
| d155 | Acquiring skills | 24 | 6% | 80 | 16% |
| d230 | Carrying out daily routine | 7 | 2% | 1 | <1% |
| d240 | Handling stress and other psychological demands | 3 | <1% | 3 | <1% |
| d420 | Transferring oneself | - | - | 1 | <1% |
| d435 | Moving objects with lower extremities | - | - | 2 | <1% |
| d445 | Hand and arm use | 1 | <1% | 4 | <1% |
| d450 | Walking | 9 | 2% | 19 | 4% |
| d455 | Moving around | 11 | 3% | 12 | 2% |
| d460 | Moving around in different locations | 2 | <1% | - | - |
| d465 | Moving around using equipment | 11 | 3% | 14 | 3% |
| d470  d475 | Using transportation  Driving | 1  2 | <1%  <1% | -  1 | -  <1% |
| d570 | Looking after one’s health | 54 | 13% | 42 | 9% |
| d640  d750 | Doing housework  Informal social relations | 1  12 | <1%  3% | -  19 | -  4% |
| d760 | Family relationships | - | - | 1 | <1% |
| d850 | Remunerative employment | 3 | <1% | 1 | <1% |
| d910 | Community life | 1 | <1% | - | - |
| d920 | Recreation and leisure | 11 | 3% | 5 | 1% |
| e120 | Products and technology for personal indoor and outdoor mobility and transportation | - | - | 2 | <1% |
| e225 | Climate | 1 | <1% | - | - |
| e570 | Social security services, systems and policies | - | - | 1 | <1% |
| e575 | General social support services, systems and policies | - | - | 4 | <1% |
| hc | Health condition | 6 | 1% | 4 | <1% |
| nd | Not definable | 22 | 5% | 1 | <1% |
| ndmh | Not definable – mental health | - | - | 1 | <1% |
| ndph | Not definable – physical health | 37 | 9% | 45 | 9% |
| ndqol | Not definable – quality of life | 2 | <1% | - | - |
| pf | Personal factor | 4 | <1% | - | - |
